# Supplementary material for: Impaired Ratio of Unsaturated to Saturated Non-Esterified Fatty Acids in Saliva from Patients with Cystic Fibrosis
Source: MDPI journal article supplement (doi:10.3390/diagnostics10110915), 2020-11-08
Supplement: s1 [file s1]

## Supplementary Materials

**Table S1.** Comparison of salivary free cholesterol and non-esterified fatty acids (NEFA) levels in CF patients with pancreatic sufficiency (PS-CF) and insufficiency (PI-CF).

| Lipids (mg/L)      | PS-CF<br>(n = 29) | PI-CF<br>(n = 37) |
|--------------------|-------------------|-------------------|
| Free cholesterol   | 0.83 (0.35–1.79)  | 0.52 (0.41–1.12)  |
| Total NEFA         | 3.11 (2.09–4.05)  | 2.80 (1.99–3.75)  |
| C16:0              | 0.93 (0.66–1.21)  | 0.90 (0.70–1.39)  |
| C18:0              | 0.86 (0.59–1.12)  | 0.82 (0.60–1.08)  |
| <i>cis</i> -C18:1  | 0.62 (0.41–0.91)  | 0.53 (0.33–0.94)  |
| C18:2              | 0.31 (0.19–0.55)  | 0.26 (0.18–0.42)  |
| U/S NEFA ratio (%) | 58.5 (31.4–86.2)  | 46.3 (34.8–56.3)  |

Data with non-parametric distributions are reported as median (interquartile range) and the comparisons have been performed by Mann Whitney *U* test. U/S NEFA ratio was calculated as follows:  $[(cis\text{-}C18:1 + C18:2) / (C16:0 + C18:0)] \times 100$ .
